# Supplementary material for: Improved production of Humira antibody in the genetically engineered Escherichia coli SHuffle, by co-expression of human PDI-GPx7 fusions
Source: PubMed Central journal article supplement (PMC7595990; doi:10.1007/s00253-020-10920-5), 2020-09-30
Supplement: 253_2020_10920_MOESM1_ESM.pdf [file 253_2020_10920_MOESM1_ESM.pdf]

## Applied Microbiology and Biotechnology

“Improved production of Humira antibody in the genetically engineered *Escherichia coli* SHuffle, by co-expression of human PDI-GPx7 fusions.”

Marine Lénon<sup>1,2</sup>, Na Ke<sup>1</sup>, Cecily Szady<sup>1</sup>, Hassan Sakhtah<sup>1</sup>, Guoping Ren<sup>1</sup>, Bruno Manta<sup>1,3</sup>, Bryce Causey<sup>1</sup> and Mehmet Berkmen<sup>1\*</sup>

<sup>1</sup> New England Biolabs, 240 County Road, Ipswich, MA 01938, USA

<sup>2</sup> Current address: Department of Microbiology, Stress Adaptation and Metabolism in Enterobacteria Unit, UMR CNRS 2001, Institut Pasteur, 25-28 Rue du Dr Roux, 75015, Paris, France

<sup>3</sup> Current address: Facultad de Medicina, Departamento de Bioquímica and Centro de Investigaciones Biomédicas, Universidad de la República, CP 11800 Montevideo, Uruguay.

\*Correspondence: Phone: (978) 380-7519; Fax: (978) 921-1350; Email: [berkmen@neb.com](mailto:berkmen@neb.com)

|           |                                                                                                                                                     |     |
|-----------|-----------------------------------------------------------------------------------------------------------------------------------------------------|-----|
| Human     | -----                                                                                                                                               | 0   |
| Mouse     | -----                                                                                                                                               | 0   |
| Chicken   | ----- <u>ML</u>                                                                                                                                     | 2   |
| Zebrafish | -----                                                                                                                                               | 0   |
| Mollusk   | ----- <u>METSMSPKICPKNILNVVLFSSFFVNIFNEILCGPATI</u>                                                                                                 | 38  |
| Sponge    | -----                                                                                                                                               | 0   |
| Pear      | <u>MASMSFSATFSTPSQSFSAKAKAKISSNSSASCPPMACW-<u>IKFS</u>--FGSS</u> -----                                                                              | 46  |
| Consensus | -----                                                                                                                                               | 0   |
|           |                                                                                                                                                     |     |
| Human     | ----- <u>MVAATVAAAWLLWAAACAQQEQDFYDFKAVNIRGKLV</u> S                                                                                                | 39  |
| Mouse     | ----- <u>MVAAVATAWLLWAAACAQSEQDFYDFKAVNIRGKLV</u> S                                                                                                 | 38  |
| Chicken   | <u>DPEGSVEHKPSSSPKVF</u> LIPLAMLAITALLLAFSATQQKETDFYTFKVVNIRGKLV                                                                                    | 62  |
| Zebrafish | ----- <u>MGMFLR-AFTLIILLCLLEAKQKDFYTFKVVNSRGR</u> LV                                                                                                | 38  |
| Mollusk   | DPLK-VKKKPGYRPS-----TGGLQPGEIVYEDVPTTDEPEKDFYMFVTDIKGKTV                                                                                            | 91  |
| Sponge    | ----- <u>MEQVFF</u> ----- <u>LSLFC</u> LICGALASSGTETFYSLSAKDITGKMIG                                                                                 | 39  |
| Pear      | ---KSALFRNGLSLQSENF--NGVLIKSR---SFGVYARAATERSLYDFTVKDIDGKDV                                                                                         | 98  |
| Consensus | ----- <u>QQEQDFYDFKAVNIRGKLV</u> S                                                                                                                  | 20  |
|           |                                                                                                                                                     |     |
| Human     | LEKYRGSVSLVNVVASE <u>CG</u> FTDQHRYALQQLQ <del>RD</del> LGP <u>H</u> - <u>HF</u> NVLA <u>FP</u> <u>C</u> NQFGQ <del>Q</del> EPDSN <u>K</u>          | 98  |
| Mouse     | LEKYRGSVSLVNVVASE <u>CG</u> FTDQNYRALQQLQ <del>RD</del> LGP <u>H</u> - <u>HF</u> NVLA <u>FP</u> <u>C</u> NQFGQ <del>Q</del> EPD <u>TNR</u>          | 97  |
| Chicken   | LEKYRGSVSLVNVVASE <u>CG</u> FTD <u>SHYKALQQLQ</u> KDLGPY-HFNVLA <u>FP</u> <u>C</u> NQFGQ <del>Q</del> EPD <u>TNK</u>                                | 121 |
| Zebrafish | LEKYRGSVSLAVNVVASE <u>CGYTD</u> SHYKDLQQLQKDFGPF-HFNVLA <u>FP</u> <u>C</u> NQFGQ <del>Q</del> EP <u>SDK</u>                                         | 97  |
| Mollusk   | LEEYRGMVTLVNVVASE <u>CGYTD</u> SHYKALVKLQNTLAPSGKFTVLA <u>FP</u> <u>C</u> NQFGA <del>Q</del> EPK <u>DEP</u>                                         | 151 |
| Sponge    | FERYSGKIVLVNVVASE <u>CGYTD</u> YNYIQLNQLQ <del>RY</del> GEE-SLAILA <u>FP</u> <u>C</u> NQFGA <del>Q</del> EP <u>AKDS</u>                             | 98  |
| Pear      | LSKFKGKVLVNVVASE <u>RCGLTSS</u> NYSEL <u>SHLYE</u> KYK <u>PQ</u> -GFEILA <u>FP</u> <u>C</u> NQFGG <del>Q</del> EP <u>GSNG</u>                       | 157 |
| Consensus | LEKYRGSVSLVNVVASE <u>CG</u> FTDQHRYALQQLQ <del>RD</del> LGP <u>H</u> - <u>HF</u> NVLA <u>FP</u> <u>C</u> NQFGQ <del>Q</del> EP <u>DSNR</u>          | 79  |
|           |                                                                                                                                                     |     |
| Human     | EIESFARRTYSVS <u>F</u> PMFSKIAV <u>T</u> GTGAHPAFKYLAQ-TS---GKEPTW <u>N</u> FWKYLVAPD <u>GK</u>                                                     | 154 |
| Mouse     | EIENFARRTYSVS <u>F</u> PMFSKIAV <u>T</u> GTGAHPAFKYLTQ-TS---GKEPTW <u>N</u> FWKYLVDPD <u>GK</u>                                                     | 153 |
| Chicken   | EIESFARKTYGAS <u>F</u> PMFSKVA <u>V</u> SGAGAI <u>P</u> AFKYLI <u>D</u> -ST---GEEPTW <u>N</u> FWKYLVDP <u>NGK</u>                                   | 177 |
| Zebrafish | EIDSFVRRVYGVS <u>F</u> PIFSKIA <u>V</u> VGIGANNAYKY <u>LVE</u> -AS---RKEPTW <u>N</u> FWKYLI <u>D</u> TD <u>GK</u>                                   | 153 |
| Mollusk   | SIEKFAKEYGVN <u>F</u> PMFSKIN <u>V</u> VEKDIPEAWK <u>FLED</u> -FS---RLVP <u>N</u> WFWKYLI <u>N</u> PS <u>GH</u>                                     | 207 |
| Sponge    | EINSMIRYKY <u>K</u> Q <u>P</u> FLFSKVN <u>V</u> TGESQSEVY <u>RFL</u> INSTN---GLE <u>P</u> KW <u>N</u> FKY <u>L</u> DRD <u>G</u> L                   | 155 |
| Pear      | EIKQ <u>F</u> ACTR <u>F</u> KA <u>E</u> FP <u>I</u> FDKVD <u>V</u> NGPSTAPVYQ <u>F</u> LKSSAGG <u>FL</u> GDIK <u>W</u> NFEK <u>F</u> LDK <u>NGK</u> | 217 |
| Consensus | EIESFARRTYSVS <u>F</u> PMFSKVA <u>V</u> GTGAHPAFKY <u>L</u> TE-TS---GKEPTW <u>N</u> FWKYLVAPD <u>GK</u>                                             | 135 |
|           |                                                                                                                                                     |     |
| Human     | VVGAWDPTVSVEEVRPQITALVRKLIL----- <u>KREDL</u>                                                                                                       | 187 |
| Mouse     | VVGAWDPTVPVAEIKPRITEQVMKLILR----- <u>KREDL</u>                                                                                                      | 186 |
| Chicken   | VVKAWDSTVSVEEIRPHVTELVRKIILK----- <u>KKDEL</u>                                                                                                      | 210 |
| Zebrafish | VVDAGPEVSVKEIRPRITEMVRKLIK----- <u>RKEEL</u>                                                                                                        | 186 |
| Mollusk   | VIATWGPWIPVEDVIEQITEAVHAAADDLVVSDTIHEEL                                                                                                             | 246 |
| Sponge    | VVQFFDQGKTFDKIYDSIDGLLYRKR----- <u>REL</u>                                                                                                          | 184 |
| Pear      | VVERYPPPTTSPFQIEKDIQKLVA-----                                                                                                                       | 240 |
| Consensus | VVGAWDPTVSVEEIRPQITALVRKLILK----- <u>KREDL</u>                                                                                                      | 168 |

**Figure S1. Sequence alignment of the candidate GPx7 proteins.** The alignment was obtained using ClustalW and manually edited. Amino acids whose identify threshold is above 80% are shaded in gray. Cysteines are highlighted in yellow, signal peptide is underlined in red, dimer interface is underlined in black, arrows point at catalytic residues determined from Conserved Domain Database (<https://www.ncbi.nlm.nih.gov/Structure/cdd/cdd.shtml>) and the classical C-terminal ER retention signal sequence KDEL for lumen bound proteins is underlined in green.

**Table S1. Primers used in construction of plasmids.**

| Name                | Sequence (5' to 3')                                     |
|---------------------|---------------------------------------------------------|
| NK1012-flag-r       | caagcttgGTCGACTTActtgtcatcgtcatccttgtaatcgatgtcatg      |
| NK1013-c-f          | GAAAAACGTGAAGACCTGgactacaaagaccatgacggtgattataaagat     |
| NK1014-pxb-f        | CTGGTTGCGGCGgactacaaagaccatgacggtgattataaagat           |
| NK1015-aqu-f        | GCGCCGTGAACTGgactacaaagaccatgacggtgattataaagat          |
| NK1016-lak-f        | CATTCACGAGGAGCTGgactacaaagaccatgacggtgattataaagat       |
| NK1017-dre-f        | CGCAAGGAAGAGCTGgactacaaagaccatgacggtgattataaagat        |
| NK1018-gga-f        | CCTGAAGAAGAAAGATGAACTGgactacaaagaccatgacggtgattataaagat |
| NK1019-mmu-f        | GTAAGCGTGAAGACCTGgactacaaagaccatgacggtgattataaagat      |
| NK1020-has-f        | GAAACGTGAGGACCTGgactacaaagaccatgacggtgattataaagat       |
| 5'-nsGpx7 (NcoI)    | ggTCCATGGccCAGCAGGAGCAGGACTTC                           |
| 3'-nsGpx7 (HindIII) | ggTAAGCTTATAAGTCTTCTCGCTTCAGTAG                         |

**Table S2. Construction of plasmids used in this study.**

| Plasmid                          | Template                   | Primer pair                   | Cloning method                                  |
|----------------------------------|----------------------------|-------------------------------|-------------------------------------------------|
| pACYC Duet - PDI-hsa Gpx7 - Flag | pACYC Duet - PDI-hsa Gpx7* | NK1012-FLAG-r<br>NK1020-has-f | NEBuilder® HIFI<br>DNA<br>(NEB, cat. No. E5520) |
| pACYC Duet - PDI-mmu Gpx7 - Flag | pACYC Duet - PDI-mmu Gpx7* | NK1012-FLAG-r<br>NK1019-mmu-f |                                                 |
| pACYC Duet - PDI-lak Gpx7 - Flag | pACYC Duet - PDI-lak Gpx7* | NK1012-FLAG-r<br>NK1016-lak-f |                                                 |
| pACYC Duet - PDI-aqu Gpx7 - Flag | pACYC Duet - PDI-aqu Gpx7* | NK1012-FLAG-r<br>NK1015-aqu-f |                                                 |
| pACYC Duet - PDI-dre Gpx7 - Flag | pACYC Duet - PDI-dre Gpx7* | NK1012-FLAG-r<br>NK1017-dre-f |                                                 |
| pACYC Duet - cPDI-Gpx7 - Flag    | pACYC Duet - cPDI-Gpx7*    | NK1012-FLAG-r<br>NK1013-c-f   |                                                 |
| pACYC Duet - PDI-gga Gpx7 - Flag | pACYC Duet - PDI-gga Gpx7* | NK1012-FLAG-r<br>NK1018-gga-f |                                                 |
| pACYC Duet - PDI-pxb Gpx7 - Flag | pACYC Duet - PDI-pxb Gpx7* | NK1012-FLAG-r<br>NK1014-pxb-f |                                                 |
